# Supplementary material for: Highly Correlated Recurrence Prognosis in Patients with Metastatic Colorectal Cancer by Synergistic Consideration of Circulating Tumor Cells/Microemboli and Tumor Markers CEA/CA19-9
Source: MDPI journal article supplement (doi:10.3390/cells10051149), 2021-05-10
Supplement: s1 [file s1]

# Highly Correlated Recurrence Prognosis in Patients with Metastatic Colorectal Cancer by Synergistic Consideration of Circulating Tumor Cells/Microemboli and Tumor Markers

Hsueh-Yao Chu <sup>1,9,†</sup>, Chih-Yung Yang<sup>2,3,4,†</sup>, Ping-Hao Yeh<sup>1</sup>, Chun-Jieh Hsu<sup>1</sup>, Lu-Wei Chang<sup>1</sup>, Wei-Jen Chan<sup>1</sup>, Chien-Ping Lin<sup>5</sup>, You-You Lyu<sup>5</sup>, Wei-Cheng Wu<sup>1,6</sup>, Chun-Wei Lee<sup>1</sup>, Jen-Kuei Wu<sup>1,7</sup>, Jeng-Kai Jiang<sup>8,\*</sup> and Fan-Gang Tseng<sup>1,6,10,11,\*</sup>

Recovering testing of rare cells was carried out for automatic SACA imaging system. HCT116 cells were diluted in white blood cells at different ratio from 1:10,000 to 1:1,000,000. HCT116 cells were stained by Hoechst 33258 positive/EpCAM-FITC positive/CD45-PECy-7 negative, respectively, and then dispensed into SACA chip. At 1:1,000,000 dilution., roughly 11% HCT116 cells were lost during preparation, and other single target HCT116 cells were clearly identified by the automatic SACA imaging system with an 89% recovery rate.

| HCT-116 : WBC | Mixed HCT116 cells number | Detected HCT116 cells number | Average deviation value |
|---------------|---------------------------|------------------------------|-------------------------|
| 1:10,000      | 32.8 ± 1.9                | 26                           | 8%                      |
|               |                           | 29                           |                         |
|               |                           | 27                           |                         |
|               |                           | 30                           |                         |
| 1:100,000     | 31 ± 1.5                  | 25                           | 10%                     |
|               |                           | 24                           |                         |
|               |                           | 31                           |                         |
| 1:1,000,000   | 35 ± 1.9                  | 26                           | 11%                     |
|               |                           | 31                           |                         |

**Table 1.** SACA image detecting system spike-in recovering rate.

CTC clusters were detected in PB of 14 CRC patients, (mean ± SEM, 1.07 ± 0.27) and MVB (mean ± SEM, 1.17 ± 0.51) of 16 CRC patients (Figure S1). The difference of CTC clusters numbers between PB and MVB was not statistically significant.

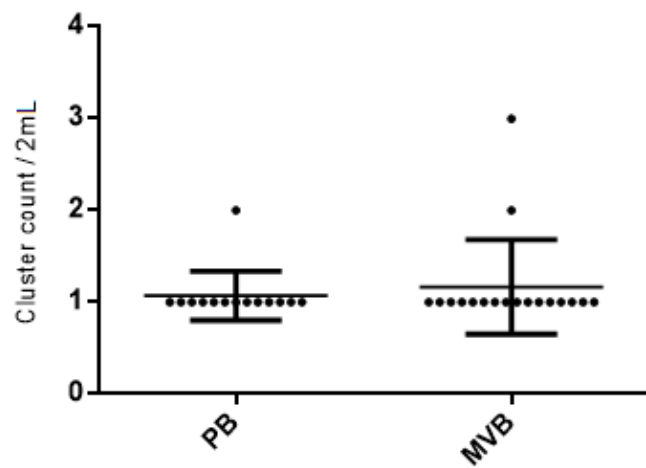

**Figure S1.** CTC clusters number of CRC patient in this research.

[https://drive.google.com/drive/u/1/folders/1o8iNmdBTN\\_1\\_-DGO9iM9y21\\_tF2eFIV](https://drive.google.com/drive/u/1/folders/1o8iNmdBTN_1_-DGO9iM9y21_tF2eFIV)

**Video S1.** The image system protocol.
